# Supplementary material for: Investigating the direct and indirect effects of forest fragmentation on plant functional diversity
Source: PubMed Central journal article supplement (PMC7331995; doi:10.1371/journal.pone.0235210), 2020-07-02
Supplement: pone.0235210.s002.pdf [file pone.0235210.s002.pdf]

| <b>Fragment</b> | <b>Type</b>       | <b>Elevation (m)</b> | <b>Area (Km2)</b> | <b>No. of plots</b> |
|-----------------|-------------------|----------------------|-------------------|---------------------|
| <b>F12</b>      | Fragment          | 1131                 | 0.01180           | 1                   |
| <b>F14</b>      | Fragment          | 982                  | 0.01279           | 1                   |
| <b>F6</b>       | Fragment          | 1024                 | 0.01336           | 1                   |
| <b>F9</b>       | Fragment          | 1125.5               | 0.03967           | 4                   |
| <b>F13</b>      | Fragment          | 1124                 | 0.16404           | 3                   |
| <b>F4</b>       | Fragment          | 1017.3               | 0.17016           | 3                   |
| <b>F7</b>       | Fragment          | 1065                 | 0.18184           | 6                   |
| <b>F18</b>      | Fragment          | 998.3                | 0.98322           | 9                   |
| <b>F17</b>      | Fragment          | 977.6                | 1.14673           | 9                   |
| <b>Forest-1</b> | Large fragment    | 1046.6               | 9.51485           | 18                  |
| <b>Forest-2</b> | Continuous forest | 1043.2               | 62.0224           | 12                  |
