# Supplementary material for: Investigating the direct and indirect effects of forest fragmentation on plant functional diversity
Source: PubMed Central journal article supplement (PMC7331995; doi:10.1371/journal.pone.0235210), 2020-07-02
Supplement: pone.0235210.s003.pdf [file pone.0235210.s003.pdf]

| Species                            | Family           | Dispersal mode <sup>a</sup> | Shade tolerance <sup>b</sup> | Seed Length (mm) | Maximum Height (m) <sup>c</sup> | Wood Density (g/cm <sup>3</sup> ) <sup>d</sup> |
|------------------------------------|------------------|-----------------------------|------------------------------|------------------|---------------------------------|------------------------------------------------|
| <i>Alangium chinense</i>           | Cornaceae        | Zoochory                    | Pioneer                      | 9                | 24                              | 0.617                                          |
| <i>Albizia gummifera</i>           | Fabaceae         | Barochory                   | Pioneer                      | 10               | 30                              | 0.544                                          |
| <i>Alchornea hirtella</i>          | Euphorbiaceae    | Zoochory                    | Pioneer                      | 4.5              | 11                              | 0.413                                          |
| <i>Allanblackia stuhlmannii</i>    | Clusiaceae       | Zoochory                    | shade tolerant               | 36.8             | 62                              | 0.646                                          |
| <i>Allophylus melliodorus</i>      | Sapindaceae      | Zoochory                    | shade tolerant               | 4                | 20                              | 0.513                                          |
| <i>Alsodeiopsis schumannii</i>     | Icacinaceae      | Zoochory                    | shade tolerant               | 23.7             | 16                              | 0.577                                          |
| <i>Anisophyllea obtusifolia</i>    | Anisophylleaceae | Zoochory                    | shade tolerant               | 21.4             | 50                              | 0.739                                          |
| <i>Annickia kummeriae</i>          | Annonaceae       | Zoochory                    | shade tolerant               | 21.7             | 22                              | 0.447                                          |
| <i>Anthocleista grandiflora</i>    | Gentianaceae     | Zoochory                    | Pioneer                      | 1                | 50                              | 0.532                                          |
| <i>Antiaris toxicaria</i>          | Moraceae         | Zoochory                    | Pioneer                      | 12.5             | 40                              | 0.383                                          |
| <i>Aoranche penduliflora</i>       | Rubiaceae        | Zoochory                    | Pioneer                      | 1.3              | 18                              | 0.807                                          |
| <i>Beilschmedia kweo</i>           | Lauraceae        | Zoochory                    | shade tolerant               | 50.8             | 40                              | 0.574                                          |
| <i>Bersama abyssinica</i>          | Meliantaceae     | Zoochory                    | non pioneer light demanding  | 11               | 30                              | 0.618                                          |
| <i>Blighia unijugata</i>           | Sapindaceae      | Zoochory                    | shade tolerant               | 10.5             | 18                              | 0.710                                          |
| <i>Bridelia micrantha</i>          | Phyllanthaceae   | Zoochory                    | Pioneer                      | 8.1              | 20                              | 0.553                                          |
| <i>Camellia sinensis</i>           | Theaceae         | Zoochory                    | NA                           | 14.1             | 2.5                             | 0.550                                          |
| <i>Celtis africana</i>             | Cannabaceae      | Zoochory                    | non pioneer light demanding  | 7                | 50                              | 0.594                                          |
| <i>Celtis gomphophylla</i>         | Cannabaceae      | Zoochory                    | non pioneer light demanding  | 6.4              | 35                              | 0.594                                          |
| <i>Celtis mildbraedii</i>          | Cannabaceae      | Zoochory                    | non pioneer light demanding  | 6                | 35                              | 0.594                                          |
| <i>Cephalosphaera usambarensis</i> | Myristicaceae    | Zoochory                    | shade tolerant               | 49.1             | 57                              | 0.430                                          |
| <i>Chrysophyllum perpulchrum</i>   | Sapotaceae       | Zoochory                    | shade tolerant               | 18.9             | 52                              | 0.655                                          |
| <i>Cleistanthus polystachyus</i>   | Phyllanthaceae   | Zoochory                    | shade tolerant               | 6                | 30                              | 0.633                                          |
| <i>Cola greenwayi</i>              | Malvaceae        | Zoochory                    | shade tolerant               | 14.5             | 35                              | 0.601                                          |
| <i>Cola usambarensis</i>           | Malvaceae        | Zoochory                    | shade tolerant               | 15               | 8                               | 0.601                                          |
| <i>Cordia sp</i>                   | Cordiaceae       | Zoochory                    | Pioneer                      | 8                | 15                              | 0.510                                          |
| <i>Craibia zimmermannii</i>        | Fabaceae         | Barochory                   | shade tolerant               | 27               | 28                              | 0.620                                          |
| <i>Cylicomorpha parviflora</i>     | Caricaceae       | Zoochory                    | Pioneer                      | 7                | 22                              | 0.226                                          |
| <i>Cynometra brachyrrhachis</i>    | Fabaceae         | Barochory                   | shade tolerant               | 20.4             | 50                              | 0.803                                          |
| <i>Cynometra longipedicellata</i>  | Fabaceae         | Barochory                   | shade tolerant               | 21               | 42                              | 0.803                                          |
| <i>Cynometra sp.</i>               | Fabaceae         | Barochory                   | shade tolerant               | 20               | 35                              | 0.803                                          |
| <i>Dasylepis integra</i>           | Achariaceae      | Zoochory                    | shade bearing                | 8.5              | 12                              | NA                                             |
| <i>Drypetes gerrardii</i>          | Putranjivaceae   | Zoochory                    | shade tolerant               | 12.3             | 50                              | 0.707                                          |
| <i>Drypetes usambarica</i>         | Putranjivaceae   | Zoochory                    | shade tolerant               | 15               | 45                              | 0.707                                          |
| <i>Englerodendron usambarense</i>  | Fabaceae         | Barochory                   | shade tolerant               | 40               | 35                              | 0.678                                          |
| <i>Entandrophragma excelsum</i>    | Meliaceae        | Anemochory                  | non pioneer light demanding  | 40               | 35                              | 0.536                                          |
| <i>Erythrococca fischeri</i>       | Euphorbiaceae    | NA                          | NA                           | 3.5              | 7.5                             | NA                                             |
| <i>Ficus exasperata</i>            | Moraceae         | Zoochory                    | Pioneer                      | 0.5              | 30                              | 0.412                                          |
| <i>Ficus sur</i>                   | Moraceae         | Zoochory                    | Pioneer                      | 0.01             | 23                              | 0.412                                          |
| <i>Funtumia africana</i>           | Apocynaceae      | Anemochory                  | Pioneer                      | 2                | 28                              | 0.424                                          |
| <i>Greenwayodendron suaveolens</i> | Annonaceae       | Zoochory                    | shade tolerant               | 10               | 32                              | 0.564                                          |

|                                         |                  |            |                             |      |    |       |
|-----------------------------------------|------------------|------------|-----------------------------|------|----|-------|
| <i>Heinsenya diervilleoides</i>         | Rubiaceae        | Zoochory   | shade tolerant              | 9.7  | 28 | 0.636 |
| <i>Ilex mitis</i>                       | Aquifoliaceae    | Zoochory   | shade tolerant              | 3.9  | 40 | 0.558 |
| <i>Isobertlinia scheffleri</i>          | Fabaceae         | Barochory  | shade tolerant              | 34.5 | 60 | 0.688 |
| <i>Isolona heinsenii</i>                | Annonaceae       | Zoochory   | shade tolerant              | 12.2 | 15 | 0.564 |
| <i>Lagynias parviflora</i>              | Rubiaceae        | Zoochory   | shade tolerant              | 12   | 20 | 0.636 |
| <i>Leptonychia usambarensis</i>         | Malvaceae        | Zoochory   | non pioneer light demanding | 12   | 22 | 0.476 |
| <i>Macaranga capensis</i>               | Euphorbiaceae    | Zoochory   | Pioneer                     | 4    | 35 | 0.381 |
| <i>Maesa lanceolata</i>                 | Primulaceae      | Zoochory   | Pioneer                     | 0.5  | 11 | 0.676 |
| <i>Maesopsis eminii</i>                 | Rhamnaceae       | Zoochory   | Pioneer                     | 20   | 40 | 0.384 |
| <i>Magnistipula butayei</i>             | Chrysobalanaceae | Zoochory   | shade tolerant              | 40   | 25 | 0.781 |
| <i>Maranthes goetzeniana</i>            | Chrysobalanaceae | Zoochory   | shade tolerant              | 30   | 52 | 0.817 |
| <i>Margaritaria discoidea</i>           | Phyllanthaceae   | Zoochory   | non pioneer light demanding | 5    | 20 | 0.664 |
| <i>Mesogyne insignis</i>                | Moraceae         | Zoochory   | shade tolerant              | 13.2 | 15 | 0.541 |
| <i>Milicia excelsa</i>                  | Moraceae         | Zoochory   | non pioneer light demanding | 2    | 50 | 0.569 |
| <i>Milletia dura</i>                    | Fabaceae         | Barochory  | Pioneer                     | 10   | 18 | 0.678 |
| <i>Morinda asteroscepa</i>              | Rubiaceae        | Zoochory   | Pioneer                     | 3    | 30 | 0.558 |
| <i>Myrianthus holstii</i>               | Urticaceae       | Zoochory   | non pioneer light demanding | 12.3 | 30 | 0.450 |
| <i>Newtonia buchananii</i>              | Fabaceae         | Anemochory | shade tolerant              | 57.5 | 57 | 0.574 |
| <i>Ocotea usambarensis</i>              | Lauraceae        | Zoochory   | shade tolerant              | 3    | 45 | 0.523 |
| <i>Oxyanthus speciosus</i>              | Rubiaceae        | Zoochory   | shade bearing               | 27   | 18 | NA    |
| <i>Parinari excelsa</i>                 | Chrysobalanaceae | Zoochory   | non pioneer light demanding | 36.8 | 50 | 0.702 |
| <i>Phoenix reclinata</i>                | Arecaceae        | Zoochory   | non pioneer light demanding | 12.5 | 20 | 0.557 |
| <i>Placodiscus amaniensis</i>           | Sapindaceae      | Zoochory   | shade tolerant              | 8    | 29 | 0.793 |
| <i>Pleiocarpa pycnantha</i>             | Apocynaceae      | Zoochory   | non pioneer light demanding | 9.5  | 30 | 0.567 |
| <i>Polyceratocarpus scheffleri</i>      | Annonaceae       | Zoochory   | shade tolerant              | 17   | 16 | 0.564 |
| <i>Polyscias fulva</i>                  | Araliaceae       | Zoochory   | Pioneer                     | 4    | 45 | 0.373 |
| <i>Pouteria adolfi-friedericii</i>      | Sapotaceae       | Zoochory   | shade tolerant              | 32.7 | 50 | 0.714 |
| <i>Pterocarpus tinctorius</i>           | Fabaceae         | Anemochory | non pioneer light demanding | 20   | 48 | 0.587 |
| <i>Quassia undulata</i>                 | Simaroubaceae    | Zoochory   | non pioneer light demanding | 35.8 | 50 | 0.324 |
| <i>Rauvolfia caffra</i>                 | Apocynaceae      | Zoochory   | Pioneer                     | 10   | 40 | 0.475 |
| <i>Rawsonia lucida</i>                  | Achariaceae      | Zoochory   | shade tolerant              | 8    | 18 | 0.745 |
| <i>Rytiginia flavida</i>                | Rubiaceae        | Zoochory   | shade tolerant              | 7    | 5  | 0.636 |
| <i>Rytiginia sp.</i>                    | Rubiaceae        | Zoochory   | shade tolerant              | 7    | 12 | 0.636 |
| <i>Rytiginia xanthhotricha</i>          | Rubiaceae        | Zoochory   | shade tolerant              | 7    | 15 | 0.636 |
| <i>Schefflerodendron usambarensense</i> | Fabaceae         | Barochory  | shade tolerant              | 16.9 | 18 | 0.678 |
| <i>Shirakiopsis elliptica</i>           | Euphorbiaceae    | Zoochory   | non pioneer light demanding | 5.3  | 30 | 0.414 |
| <i>Sorindeia madagascariensis</i>       | Anacardiaceae    | Zoochory   | shade tolerant              | 21.8 | 30 | 0.560 |
| <i>Strombosia scheffleri</i>            | Strombosiaceae   | Zoochory   | shade tolerant              | 18.3 | 40 | 0.747 |
| <i>Symphonia globulifera</i>            | Clusiaceae       | Zoochory   | shade tolerant              | 17.5 | 20 | 0.618 |
| <i>Synsepalum cerasiferum</i>           | Sapotaceae       | Zoochory   | shade tolerant              | 16.9 | 50 | 0.678 |
| <i>Synsepalum msolo</i>                 | Sapotaceae       | Zoochory   | shade tolerant              | 20.3 | 50 | 0.678 |
| <i>Syzygium guineense</i>               | Myrtaceae        | Zoochory   | shade tolerant              | 7    | 40 | 0.649 |
| <i>Tabernaemontana pachysiphon</i>      | Apocynaceae      | Zoochory   | Pioneer                     | 12.5 | 18 | 0.525 |

|                                     |             |           |                |      |    |       |
|-------------------------------------|-------------|-----------|----------------|------|----|-------|
| <i>Tabernaemontana stapfiana</i>    | Apocynaceae | Zoochory  | Pioneer        | 20   | 13 | 0.525 |
| <i>Tricalysia pallens</i>           | Rubiaceae   | Zoochory  | shade tolerant | 4    | 40 | 0.100 |
| <i>Trichilia dregeana</i>           | Meliaceae   | Zoochory  | shade tolerant | 16.6 | 35 | 0.634 |
| <i>Trichilia emetica</i>            | Meliaceae   | Zoochory  | shade tolerant | 17.5 | 30 | 0.634 |
| <i>Trilepisium madagascariense</i>  | Moraceae    | Zoochory  | shade tolerant | 14.3 | 30 | 0.541 |
| <i>Turraea holstii</i>              | Meliaceae   | Zoochory  | shade tolerant | 4.5  | 18 | 0.663 |
| <i>Uvariadendron usambarensense</i> | Annonaceae  | Zoochory  | shade tolerant | 21.4 | 15 | 0.564 |
| <i>Vangueria infuasta</i>           | Rubiaceae   | Zoochory  | shade tolerant | 25   | 7  | 0.657 |
| <i>Vepris nobilis</i>               | Rutaceae    | Zoochory  | shade tolerant | 5.5  | 25 | 0.659 |
| <i>Vitex amaniensis</i>             | Lamiaceae   | Zoochory  | shade tolerant | 13   | 30 | 0.549 |
| <i>Xylopia aethiopica</i>           | Annonaceae  | Zoochory  | Pioneer        | 6    | 45 | 0.678 |
| <i>Xymalos monospora</i>            | Monimiaceae | Zoochory  | shade tolerant | 11.8 | 17 | 0.588 |
| <i>Zanha golungensis</i>            | Sapindaceae | Zoochory  | shade tolerant | 21.7 | 24 | 0.795 |
| <i>Zanthoxylum usambarensense</i>   | Rutaceae    | Zoochory  | Pioneer        | 6    | 30 | 0.610 |
| <i>Zanthoxylum gilletti</i>         | Rutaceae    | Zoochory  | Pioneer        | 3.5  | 35 | 0.610 |
| <i>Zenkerella grotei</i>            | Leguminosae | Barochory | shade bearing  | 15   | 22 | NA    |

<sup>a</sup> dispersal mode: zoochory (animal-dispersal); anemochory (wind-dispersal); and barochory (gravity or explosive dispersal); data from Chapman et al. (2016), the African Tree Database ([https://figshare.com/articles/Plant\\_animal\\_interactions\\_from\\_Africa/1526128](https://figshare.com/articles/Plant_animal_interactions_from_Africa/1526128)) and N.J. Cordeiro & H.J. Ndangalasi, unpublished data.

<sup>b</sup> shade tolerance: pio = pioneer; shade tol = shade tolerance; non-pio light dem = non-pioneer light demanding; data classifications from Ouédraogo et al. (2013, 2016), supplemented information from Ruffo et al. (1989) and Lovett et al. (2006).

<sup>c</sup> tree height: sourced from Lovett et al. (2006) and <http://www.prota.org/>

<sup>d</sup> wood density (g/cm<sup>3</sup>) sourced from global wood density database (Chave et al. 2009; Zanne et al. 2009).

## LITERATURE CITED

- Chave, J., Coomes, D., Jansen, S., Lewis, S.L., Swenson, N.G. & Zanne, A.E. (2009) Towards a worldwide wood economics spectrum. *Ecology Letters*, **12**, 351–366.
- Lovett, J., Sørensen, L. & Lovett, J. (2006) *Field Guide to the Moist Forest Trees of Tanzania*. Society for Environmental Exploration.
- Ruffo, C.K., Mmari, C., Kibuwa, S.P., Lovett, J., Iversen, S., Hamilton, A.C. & IUCN Tropical Forest Programme. (1989) A Preliminary List of Plant Species Recorded from the East Usambara Forests. *Forest conservation in the East Usambara Mountains, Tanzania* (eds A.C. Hamilton & R. Bensted-Smith), pp. 157–180. IUCN, Gland, Switzerland.
- Zanne, A.E., Lopez-Gonzalez, G., Coomes, D.A.A., Ilic, J., Jansen, S., Lewis, S.L.S.L., Miller, R.B.B., Swenson, N.G.G., Wiemann, M.C.C. & Chave, J. (2009) Global wood density database. *Dryad*, **235**, 33.
